# Supplementary material
Source: PubMed Central journal article supplement (PMC4157956)
Supplement: NIHMS619522-supplement-01.pdf [file NIHMS619522-supplement-01.pdf]

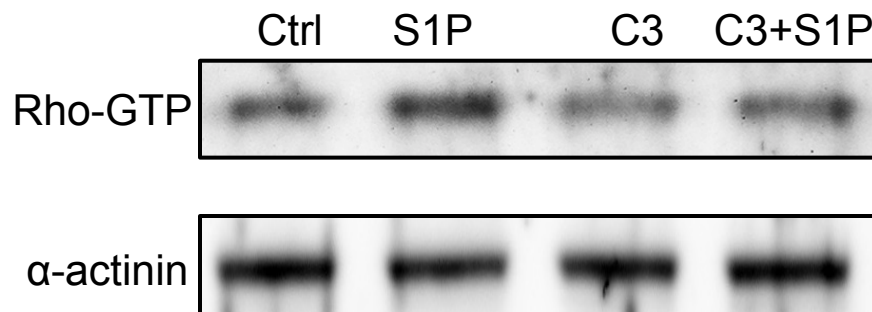

**Supplemental Figure 1. C3 treatment inhibit Rho activation in NRVMs.** NRVMs were stimulated with 5  $\mu$ M S1P. Some cells were treated with C3. RhoA activation was examined by immunoprecipitating the GTP-bound activated form of RhoA using the Rho effector rhotekin.
